# Supplementary material
Source: HighWire-hosted journal article supplement (https://ejhp.bmj.com/highwire/filestream/150629/field_highwire_adjunct_files/1/ejhpharm-2021-002803supp002_data_supplement.pdf)
Supplement: ejhpharm-2021-002803supp002_data_supplement.pdf [file ejhpharm-2021-002803supp002_data_supplement.pdf]

Supplemental figure 2 Risk of bias summary of studies.

|                     | Random sequence generation (selection bias) | Allocation concealment (selection bias) | Blinding of participants and personnel (performance bias) | Blinding of outcome assessment (detection bias) | Incomplete outcome data (attrition bias) | Selective reporting (reporting bias) | Other bias |
|---------------------|---------------------------------------------|-----------------------------------------|-----------------------------------------------------------|-------------------------------------------------|------------------------------------------|--------------------------------------|------------|
| Antonia SJ (1) 2016 | +                                           | ?                                       | -                                                         | ?                                               | +                                        | ?                                    | ?          |
| Antonia SJ (2) 2016 | +                                           | ?                                       | -                                                         | ?                                               | +                                        | ?                                    | ?          |
| Hellmann MD 2018    | +                                           | -                                       | -                                                         | -                                               | +                                        | ?                                    | ?          |
| Planchard D 2020    | +                                           | -                                       | -                                                         | -                                               | +                                        | +                                    | ?          |
| Reck M 2020         | +                                           | ?                                       | ?                                                         | ?                                               | +                                        | +                                    | ?          |
| Rizvi NA 2020       | +                                           | -                                       | -                                                         | -                                               | +                                        | +                                    | ?          |
